# Supplementary material
Source: publisher figshare collection journal article supplement (https://gsapubs.figshare.com/ndownloader/files/23320307)
Supplement: Supplementary file 1 [file 23320307]

## SUPPLEMENTAL INFORMATION

### Water loss during dynamic recrystallization of Moine thrust quartzites, NW Scotland

Andreas K. Kronenberg, Kyle T. Ashley, Matthew K. Francis, Caleb W. Holyoke III, Lynna Jezek, Johannes A. Kronenberg, Richard D. Law, Jay B. Thomas

The results and interpretations of this *Geology* paper are based on microstructural and IR absorption measurements of quartz grains in Cambrian quartzites collected from the footwall (Fig. S1) of the Moine thrust at the Stack of Glencoul, NW Scotland (Fig. 1). Supplemental information presented here includes the methods of microstructural and IR absorption measurements, tabulated results that appear in figures presented in the paper, and links to the archived digital data files.

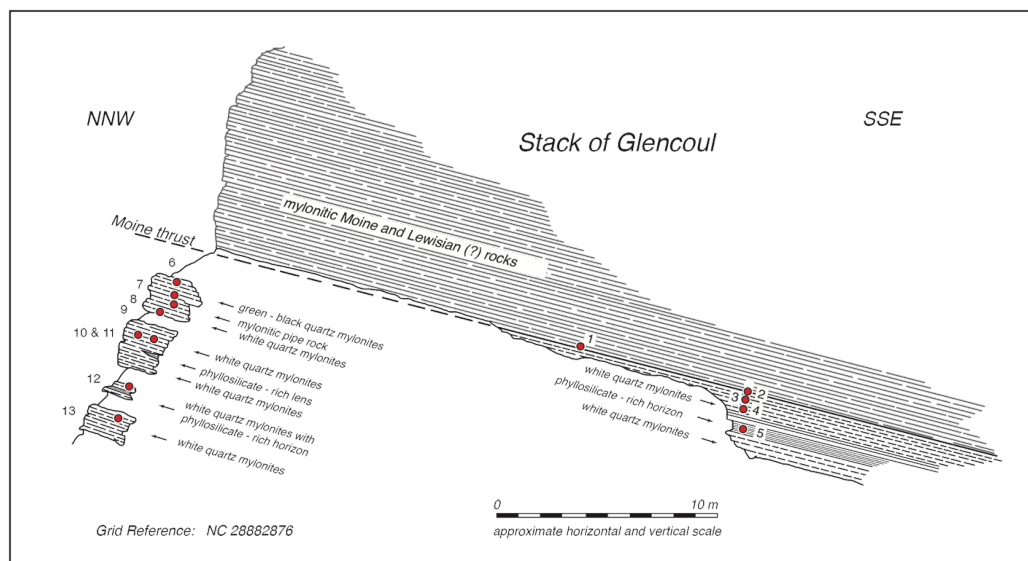

Figure S1. Sampling locations of mylonitic Cambrian quartzite samples SG-1 to SG-13 from the footwall of the Moine thrust at the Stack of Glencoul (after Law et al., 1986). Protolith Cambrian quartzite samples SG.14 and SG.15 were collected at 40 and 70 m beneath the thrust, respectively, and are separated from the overlying mylonitic quartzites along an unexposed thrust fault.

## OPTICAL MICROSTRUCTURES

Deformation and dynamic recrystallization microstructures were observed in conventional (30  $\mu\text{m}$ ) thin sections of all samples SG-1 to SG-15, prepared perpendicular to foliation and parallel to lineation (the XZ plane) and imaged between crossed polarizers (Fig. 2). The extent of recrystallization of deformed quartz grains was quantified at the scale of whole sections ( $\sim 20\mu\text{m} \times 40\mu\text{m}$  areas of observation) by applying a spatial mask over domains of recrystallized grains (or in cases of highly recrystallized samples, the original, deformed quartz grains) and determining the area fraction of recrystallized quartz using Image J software. These measurements are inferred to represent the volume % that has been dynamically recrystallized. Ultrathin, doubly polished sections (8-16  $\mu\text{m}$  thickness) sections were prepared for selected samples (using methods of Kronenberg et al., 2017) to examine undulatory extinction, subgrain

boundaries, and recrystallized grains at high optical resolution, enhancing image brightness and contrast of the low optical retardation images using Adobe Photoshop (Fig. 2 A-C). Recrystallized grain sizes were measured in standard thickness sections (for  $N > 400$  grains for selected sections) using the intercept method along traverses of several orientations to minimize sensitivity to grain shape. Chord lengths along the traverses were determined, and corrected to three-dimensional sizes (multiplying by a factor of 1.75) using methods described by Roth (2010) to find the arithmetic mean grain size. Standard deviations determined for each set of grain size measurements ( $s$ ) reflect the distribution of measured grain sizes and the standard error of the mean ( $s / \sqrt{N}$ ) reflects the uncertainty in the mean grain size determination. The correction factor converting chord length to three-dimensional grain size is appropriate when applying the theoretical piezometer of Twiss (1977) but uncorrected chord lengths should be used following methods of Stipp and Tullis (2003) when applying their experimental recrystallized grain size for quartz.

Microstructural measurements of recrystallized grains for samples SG-1 to SG-15 are compiled in Supplemental Table S1, including the structural distance of each sample below the Moine thrust, the fraction of quartz that has been recrystallized, the mean recrystallized quartz grain size, the standard deviation of grain size, the number of measurements of grain dimension, and the standard error of the mean. The proportions of the quartzites that are dynamically recrystallized decrease from ~97% just below the Moine thrust (0.005 m) to 17% (mostly at original quartz grain margins) at 70 m below the thrust. These measurements support the trend of % recrystallization with proximity to the Moine thrust reported by Weathers et al. (1979), although values for our samples are generally larger at a given structural distance (Figure 4A) than those of samples measured in the previous study. Some of our sections contain finely dispersed micas (identified in Table S1) and these sections tend to display lower proportions of recrystallized quartz grains than sections with few micas.

**Supplemental Table S1. Microstructural measurements for recrystallized grains of quartzites beneath the Moine thrust, Stack of Glencoul, NW Scotland**

| Sample | Structural Distance below Thrust (m) | Recrystallized Grains |                                   |                                      |     |                                          |
|--------|--------------------------------------|-----------------------|-----------------------------------|--------------------------------------|-----|------------------------------------------|
|        |                                      | % Recrystallized      | Mean Grain Size ( $\mu\text{m}$ ) | Standard Deviation ( $\mu\text{m}$ ) | N   | Standard Error of Mean ( $\mu\text{m}$ ) |
| SG-1*  | 0.005                                | 97.46                 |                                   |                                      |     |                                          |
| SG-2*  | 0.01                                 | 99.50                 |                                   |                                      |     |                                          |
| SG-3   | 0.3                                  | 94.11                 | 23.14                             | 4.55                                 | 617 | .18                                      |
| SG-4   | 0.7                                  | 95.83                 | 21.70                             | 3.87                                 | 749 | .14                                      |
| SG-6   | 1.9                                  | 92.99                 | 24.71                             | 4.20                                 | 410 | .21                                      |
| SG-7*  | 2.5                                  | 62.74                 | 19.15                             | 5.59                                 | 757 | .20                                      |
| SG-8   | 2.9                                  | 76.67                 | 22.90                             | 4.16                                 | 710 | .16                                      |
| SG-9   | 3.55                                 | 74.17                 |                                   |                                      |     |                                          |
| SG-10  | 4.6                                  | 72.16                 | 21.25                             | 3.76                                 | 668 | .15                                      |
| SG-11  | 4.6                                  | 66.06                 | 20.05                             | 3.07                                 | 803 | .11                                      |
| SG-12  | 7.3                                  | 47.93                 |                                   |                                      |     |                                          |
| SG-13  | 8.5                                  | 58.84                 | 20.39                             | 3.31                                 | 692 | .13                                      |
| SG-14  | 40                                   | 20.31                 |                                   |                                      |     |                                          |
| SG-15  | 70                                   | 17.35                 |                                   |                                      |     |                                          |

\*domains of recrystallized quartz grains mixed with fine micas

Large penetrative strains are apparent from the large aspect ratio (ribbon) shapes of original detrital quartz grains (Christie, 1963) and lattice preferred orientations (LPO) indicate the onset of even larger shear strains (and large vorticities,  $W_m$ ) within recrystallized grains related to large shear displacements (within 0.2 m of the Moine thrust plane; Law et al., 1986, 2010). Thus, we interpret the trend of % recrystallization as a function of structural distance from the Moine thrust as a proxy for finite shear strains imposed during thrusting, which may exceed the relatively uniform, quantitative strains determined from grain shapes (Law et al., 2010).

Mean recrystallized grain sizes, as reported by Weathers et al. (1979), do not vary much (from 19 to 25  $\mu\text{m}$ ), even while their volume fraction and spatial occurrence at the grain scale vary significantly. These observations, combined with microstructural piezometers that relate mean recrystallized grain size to differential stress, independent of temperature and strain rate, (Twiss, 1977; Stipp and Tullis, 2003) lead us to concur with the conclusion of Weathers et al. (1979) that shear stresses during thrusting were nearly constant across the sampled traverse of the Moine thrust footwall, even while penetrative shear strains were localized. Shear stresses of 25-75 MPa were inferred by Weathers et al. (1979) using a number of microstructural piezometers. Preliminary applications of the Twiss (1977) and Stipp and Tullis (2003) piezometers to our grain size measurements fall within this range, with shear stresses of  $\sim 61$  MPa based on the Twiss (1977) relationship and  $\sim 46$  MPa based on the Stipp and Tullis (2003) piezometer, applying the Holyoke and Kronenberg (2010) correction (Francis and Law, in preparation).

## INFRARED ABSORPTION MEASUREMENTS

Doubly polished IR plates of uniform thickness (95-182  $\mu\text{m}$ ) were prepared perpendicular to foliation and parallel to lineation (the XY plane), and unpolarized IR spectra were measured using a Nicolet Magna 560 FTIR Spectrometer and NicPlan IR microscope, at a resolution of 4  $\text{cm}^{-1}$  through a 100  $\mu\text{m}$  square aperture (compiling 512 scans for each measurement) using methods described in Kronenberg et al. (2017). Integrated absorbances of OH stretching bands were determined, subtracting a linear background and separating OH absorbances of the broad band at 3400  $\text{cm}^{-1}$  due to fluid inclusions in quartz grains and a sharper OH band at 3620  $\text{cm}^{-1}$  due to mica inclusions. IR spectra represent results for individual quartz grains in all samples except for SG-1. Apertures were located well within larger quartz grains but this was more difficult to accomplish for smaller quartz porphyroclasts; as a result, spectra may sometimes include OH bands of water that is vicinal to or at grain boundaries. IR spectra for SG-1 include measurements for all larger, original quartz grains, but they also include results for polycrystalline domains of finely recrystallized quartz, selecting those domains with few intergranular white micas.

FTIR measurements for SG-1 to SG-15 are compiled in Supplemental Table S2, including integrated absorbances (in  $\text{cm}^{-2}$ ) of the 3400  $\text{cm}^{-1}$  and 3620  $\text{cm}^{-1}$  OH bands due to fluid inclusions and mica inclusions, respectively, for 22-39 spectra of each sample. OH contents in molar ppm ( $\text{OH}/10^6 \text{ Si}$ ) due to fluid inclusions in quartz grains were determined using the calibration of Aines et al. (1984) for broad-band molecular water in quartz. Mean OH contents of quartz grains in SG-1 to SG-15, located at varying structural levels below the Moine thrust are listed in Supplemental Table S3, with standard deviations that represent variations in water contents of

quartz grains in a given sample and standard errors of mean OH content that represent uncertainties in the mean determination at a given structural level.

**Supplemental Table S2. FTIR measurements of OH absorption bands of quartzites beneath the Moine thrust, Stack of Glencoul, NW Scotland**

| Sample | Structural Distance below Thrust (m) | OH Absorption Band Measurements      |              |                                                             |                                                             |                   |
|--------|--------------------------------------|--------------------------------------|--------------|-------------------------------------------------------------|-------------------------------------------------------------|-------------------|
|        |                                      | IR Plate thickness ( $\mu\text{m}$ ) | Quartz Grain | $\Delta$ of 3400 $\text{cm}^{-1}$ band ( $\text{cm}^{-2}$ ) | $\Delta$ of 3620 $\text{cm}^{-1}$ band ( $\text{cm}^{-2}$ ) | OH Content* (ppm) |
| SG-1   | 0.005                                | 95                                   | 1            | 2246                                                        | 0                                                           | 2358              |
|        |                                      |                                      | 2            | 3967                                                        | 0                                                           | 4167              |
|        |                                      |                                      | 3            | 3902                                                        | 0                                                           | 4097              |
|        |                                      |                                      | 4            | 719                                                         | 0                                                           | 755               |
|        |                                      |                                      | 5            | 1324                                                        | 0                                                           | 1390              |
|        |                                      |                                      | 6            | 2258                                                        | 19                                                          | 2371              |
|        |                                      |                                      | 7            | 368                                                         | 42                                                          | 386               |
|        |                                      |                                      | 8            | 736                                                         | 0                                                           | 772               |
|        |                                      |                                      | 9            | 671                                                         | 369                                                         | 705               |
|        |                                      |                                      | 10           | 1155                                                        | 0                                                           | 1212              |
|        |                                      |                                      | 11           | 1413                                                        | 0                                                           | 1483              |
|        |                                      |                                      | 12           | 1763                                                        | 0                                                           | 1852              |
|        |                                      |                                      | 13           | 1239                                                        | 0                                                           | 1301              |
|        |                                      |                                      | 14           | 3227                                                        | 0                                                           | 3388              |
|        |                                      |                                      | 15           | 920                                                         | 627                                                         | 966               |
|        |                                      |                                      | 16           | 1165                                                        | 0                                                           | 1223              |
|        |                                      |                                      | 17           | 878                                                         | 0                                                           | 922               |
|        |                                      |                                      | 18           | 1352                                                        | 0                                                           | 1419              |
|        |                                      |                                      | 19           | 848                                                         | 0                                                           | 891               |
|        |                                      |                                      | 20           | 905                                                         | 0                                                           | 950               |
|        |                                      |                                      | 21           | 612                                                         | 0                                                           | 642               |
|        |                                      |                                      | 22           | 1201                                                        | 151                                                         | 1261              |
| SG-7   | 2.5                                  | 106                                  | 1            | 1325                                                        | 42                                                          | 1391              |
|        |                                      |                                      | 2            | 1520                                                        | 1719                                                        | 1596              |
|        |                                      |                                      | 3            | 1364                                                        | 66                                                          | 1432              |
|        |                                      |                                      | 5            | 2352                                                        | 358                                                         | 2470              |
|        |                                      |                                      | 6            | 2317                                                        | 495                                                         | 2433              |
|        |                                      |                                      | 7            | 1810                                                        | 58                                                          | 1901              |
|        |                                      |                                      | 8            | 1937                                                        | 12                                                          | 2034              |
|        |                                      |                                      | 9            | 778                                                         | 50                                                          | 817               |

**Supplemental Table S2 (cont). FTIR measurements of OH absorption bands of quartzites beneath the Moine thrust, Stack of Glencoul, NW Scotland**

| Sample | Structural Distance below Thrust (m) | OH Absorption Band Measurements      |              |                                                             |                                                             |                   |
|--------|--------------------------------------|--------------------------------------|--------------|-------------------------------------------------------------|-------------------------------------------------------------|-------------------|
|        |                                      | IR Plate thickness ( $\mu\text{m}$ ) | Quartz Grain | $\Delta$ of 3400 $\text{cm}^{-1}$ band ( $\text{cm}^{-2}$ ) | $\Delta$ of 3620 $\text{cm}^{-1}$ band ( $\text{cm}^{-2}$ ) | OH Content* (ppm) |
| SG-7   | 2.5                                  | 106                                  | 10           | 8030                                                        | 302                                                         | 8432              |
|        |                                      |                                      | 14           | 356                                                         | 162                                                         | 374               |
|        |                                      |                                      | 15           | 1570                                                        | 235                                                         | 1648              |
|        |                                      |                                      | 16           | 2433                                                        | 84                                                          | 2555              |
|        |                                      |                                      | 17           | 1203                                                        | 25                                                          | 1263              |
|        |                                      |                                      | 18           | 1399                                                        | 131                                                         | 1469              |
|        |                                      |                                      | 19           | 2051                                                        | 610                                                         | 2154              |
|        |                                      |                                      | 20           | 1190                                                        | 458                                                         | 1249              |
|        |                                      |                                      | 21           | 2414                                                        | 1103                                                        | 2535              |
|        |                                      |                                      | 22           | 1353                                                        | 677                                                         | 1421              |
|        |                                      |                                      | 23           | 2227                                                        | 1711                                                        | 2338              |
|        |                                      |                                      | 24           | 2651                                                        | 319                                                         | 2784              |
|        |                                      |                                      | 25           | 2220                                                        | 1586                                                        | 2331              |
|        |                                      |                                      | 27           | 1882                                                        | 238                                                         | 1976              |
|        |                                      |                                      | 28           | 3150                                                        | 375                                                         | 3308              |
|        |                                      |                                      | 29           | 2261                                                        | 33                                                          | 2374              |
|        |                                      |                                      | 30           | 2074                                                        | 1078                                                        | 2178              |
|        |                                      |                                      | 31           | 3204                                                        | 2000                                                        | 3364              |
|        |                                      |                                      | 32           | 2263                                                        | 734                                                         | 2376              |
|        |                                      |                                      | 33           | 1454                                                        | 383                                                         | 1527              |
|        |                                      |                                      | 34           | 7029                                                        | 1600                                                        | 7380              |
|        |                                      |                                      | 35           | 2068                                                        | 691                                                         | 2171              |
|        |                                      |                                      | 36           | 1942                                                        | 759                                                         | 2039              |
|        |                                      |                                      | 37           | 614                                                         | 28                                                          | 645               |
|        |                                      |                                      | 38           | 398                                                         | 0                                                           | 418               |
|        |                                      |                                      | 40           | 1852                                                        | 855                                                         | 1945              |
|        |                                      |                                      | 41           | 3115                                                        | 509                                                         | 3271              |
|        |                                      |                                      | 42           | 1871                                                        | 541                                                         | 1965              |
|        |                                      |                                      | 43           | 2075                                                        | 1648                                                        | 2179              |
| SG-8   | 2.9                                  | 136                                  | 1            | 444                                                         | 713                                                         | 466               |
|        |                                      |                                      | 2            | 1006                                                        | 22                                                          | 1056              |
|        |                                      |                                      | 3            | 457                                                         | 58                                                          | 480               |
|        |                                      |                                      | 4            | 1176                                                        | 32                                                          | 1235              |

**Supplemental Table S2 (cont). FTIR measurements of OH absorption bands of quartzites beneath the Moine thrust, Stack of Glencoul, NW Scotland**

| Sample | Structural Distance below Thrust (m) | OH Absorption Band Measurements      |              |                                                             |                                                             |                   |
|--------|--------------------------------------|--------------------------------------|--------------|-------------------------------------------------------------|-------------------------------------------------------------|-------------------|
|        |                                      | IR Plate thickness ( $\mu\text{m}$ ) | Quartz Grain | $\Delta$ of 3400 $\text{cm}^{-1}$ band ( $\text{cm}^{-2}$ ) | $\Delta$ of 3620 $\text{cm}^{-1}$ band ( $\text{cm}^{-2}$ ) | OH Content* (ppm) |
| SG-8   | 2.9                                  | 136                                  | 5            | 2269                                                        | 432                                                         | 2382              |
|        |                                      |                                      | 6            | 766                                                         | 319                                                         | 804               |
|        |                                      |                                      | 7            | 1089                                                        | 162                                                         | 1143              |
|        |                                      |                                      | 8            | 1655                                                        | 1174                                                        | 1738              |
|        |                                      |                                      | 9            | 121                                                         | 107                                                         | 127               |
|        |                                      |                                      | 10           | 1091                                                        | 74                                                          | 1146              |
|        |                                      |                                      | 11           | 1208                                                        | 118                                                         | 1268              |
|        |                                      |                                      | 12           | 170                                                         | 12                                                          | 179               |
|        |                                      |                                      | 13           | 404                                                         | 94                                                          | 424               |
|        |                                      |                                      | 14           | 1369                                                        | 61                                                          | 1437              |
|        |                                      |                                      | 15           | 880                                                         | 115                                                         | 924               |
|        |                                      |                                      | 16           | 2554                                                        | 1369                                                        | 2682              |
|        |                                      |                                      | 17           | 718                                                         | 210                                                         | 754               |
|        |                                      |                                      | 18           | 1110                                                        | 149                                                         | 1165              |
|        |                                      |                                      | 19           | 2648                                                        | 495                                                         | 2780              |
|        |                                      |                                      | 20           | 2552                                                        | 621                                                         | 2680              |
|        |                                      |                                      | 21           | 1971                                                        | 88                                                          | 2070              |
|        |                                      |                                      | 22           | 1058                                                        | 97                                                          | 1111              |
|        |                                      |                                      | 23           | 602                                                         | 12                                                          | 632               |
|        |                                      |                                      | 24           | 1603                                                        | 0                                                           | 1683              |
|        |                                      |                                      | 25           | 898                                                         | 181                                                         | 943               |
|        |                                      |                                      | 26           | 967                                                         | 469                                                         | 1015              |
|        |                                      |                                      | 27           | 1445                                                        | 28                                                          | 1517              |
|        |                                      |                                      | 28           | 1649                                                        | 137                                                         | 1731              |
|        |                                      |                                      | 29           | 1040                                                        | 62                                                          | 1092              |
|        |                                      |                                      | 30           | 905                                                         | 164                                                         | 950               |
| SG-10  | 4.6                                  | 120                                  | 1            | 1897                                                        | 0                                                           | 1992              |
|        |                                      |                                      | 2            | 2376                                                        | 238                                                         | 2495              |
|        |                                      |                                      | 3            | 1434                                                        | 29                                                          | 1506              |
|        |                                      |                                      | 4            | 2393                                                        | 46                                                          | 2513              |
|        |                                      |                                      | 5            | 2955                                                        | 0                                                           | 3103              |
|        |                                      |                                      | 6            | 2332                                                        | 0                                                           | 2449              |

**Supplemental Table S2 (cont). FTIR measurements of OH absorption bands of quartzites beneath the Moine thrust, Stack of Glencoul, NW Scotland**

| Sample | Structural Distance below Thrust (m) | OH Absorption Band Measurements      |              |                                                             |                                                             |                   |
|--------|--------------------------------------|--------------------------------------|--------------|-------------------------------------------------------------|-------------------------------------------------------------|-------------------|
|        |                                      | IR Plate thickness ( $\mu\text{m}$ ) | Quartz Grain | $\Delta$ of 3400 $\text{cm}^{-1}$ band ( $\text{cm}^{-2}$ ) | $\Delta$ of 3620 $\text{cm}^{-1}$ band ( $\text{cm}^{-2}$ ) | OH Content* (ppm) |
| SG-10  | 4.6                                  | 120                                  | 8            | 1424                                                        | 437                                                         | 1495              |
|        |                                      |                                      | 9            | 2775                                                        | 0                                                           | 2914              |
|        |                                      |                                      | 11           | 2344                                                        | 34                                                          | 2461              |
|        |                                      |                                      | 11B          | 3458                                                        | 36                                                          | 3631              |
|        |                                      |                                      | 12           | 2030                                                        | 22                                                          | 2131              |
|        |                                      |                                      | 13           | 3885                                                        | 0                                                           | 4079              |
|        |                                      |                                      | 14           | 1448                                                        | 0                                                           | 1520              |
|        |                                      |                                      | 17           | 2975                                                        | 60                                                          | 3124              |
|        |                                      |                                      | 18           | 3432                                                        | 95                                                          | 3604              |
|        |                                      |                                      | 19           | 2849                                                        | 30                                                          | 2991              |
|        |                                      |                                      | 20           | 2346                                                        | 17                                                          | 2463              |
|        |                                      |                                      | 21           | 2629                                                        | 56                                                          | 2760              |
|        |                                      |                                      | 22           | 1255                                                        | 111                                                         | 1318              |
|        |                                      |                                      | 23           | 2372                                                        | 0                                                           | 2491              |
|        |                                      |                                      | 24           | 2113                                                        | 0                                                           | 2219              |
|        |                                      |                                      | 26           | 4178                                                        | 0                                                           | 4387              |
|        |                                      |                                      | 27           | 2405                                                        | 0                                                           | 2525              |
|        |                                      |                                      | 28           | 2345                                                        | 37                                                          | 2462              |
|        |                                      |                                      | 29           | 2091                                                        | 236                                                         | 2196              |
|        |                                      |                                      | 30           | 982                                                         | 61                                                          | 1031              |
|        |                                      |                                      | 31           | 2434                                                        | 248                                                         | 2556              |
|        |                                      |                                      | 33           | 1835                                                        | 77                                                          | 1927              |
|        |                                      |                                      | 35           | 2558                                                        | 67                                                          | 2686              |
|        |                                      |                                      | 36           | 1930                                                        | 149                                                         | 2027              |
|        |                                      |                                      | 37           | 2292                                                        | 624                                                         | 2407              |
|        |                                      |                                      | 38           | 2634                                                        | 24                                                          | 2766              |
|        |                                      |                                      | 39           | 2297                                                        | 269                                                         | 2412              |
|        |                                      |                                      | 40           | 2066                                                        | 111                                                         | 2169              |
|        |                                      |                                      | 41           | 1798                                                        | 373                                                         | 1888              |
|        |                                      |                                      | 42           | 2118                                                        | 339                                                         | 2224              |
|        |                                      |                                      | 44           | 1916                                                        | 249                                                         | 2012              |
|        |                                      |                                      | 45           | 1539                                                        | 162                                                         | 1616              |
|        |                                      |                                      | 46           | 2189                                                        | 30                                                          | 2298              |

**Supplemental Table S2 (cont). FTIR measurements of OH absorption bands of quartzites beneath the Moine thrust, Stack of Glencoul, NW Scotland**

| Sample | Structural Distance below Thrust (m) | OH Absorption Band Measurements      |              |                                                             |                                                             |                   |
|--------|--------------------------------------|--------------------------------------|--------------|-------------------------------------------------------------|-------------------------------------------------------------|-------------------|
|        |                                      | IR Plate thickness ( $\mu\text{m}$ ) | Quartz Grain | $\Delta$ of 3400 $\text{cm}^{-1}$ band ( $\text{cm}^{-2}$ ) | $\Delta$ of 3620 $\text{cm}^{-1}$ band ( $\text{cm}^{-2}$ ) | OH Content* (ppm) |
| SG-13  | 8.5                                  | 151                                  | 1            | 5616                                                        | 43                                                          | 5897              |
|        |                                      |                                      | 2            | 4645                                                        | 47                                                          | 4877              |
|        |                                      |                                      | 3            | 2776                                                        | 0                                                           | 2915              |
|        |                                      |                                      | 4            | 2058                                                        | 0                                                           | 2161              |
|        |                                      |                                      | 5            | 3098                                                        | 0                                                           | 3253              |
|        |                                      |                                      | 6            | 1672                                                        | 39                                                          | 1756              |
|        |                                      |                                      | 7            | 1765                                                        | 33                                                          | 1853              |
|        |                                      |                                      | 8            | 2771                                                        | 0                                                           | 2910              |
|        |                                      |                                      | 9            | 2200                                                        | 0                                                           | 2310              |
|        |                                      |                                      | 10           | 2129                                                        | 95                                                          | 2235              |
|        |                                      |                                      | 11           | 1895                                                        | 0                                                           | 1990              |
|        |                                      |                                      | 12           | 1507                                                        | 25                                                          | 1582              |
|        |                                      |                                      | 13           | 3849                                                        | 88                                                          | 4041              |
|        |                                      |                                      | 14           | 1239                                                        | 0                                                           | 1301              |
|        |                                      |                                      | 15           | 3019                                                        | 0                                                           | 3170              |
|        |                                      |                                      | 16           | 2196                                                        | 0                                                           | 2306              |
|        |                                      |                                      | 17           | 3211                                                        | 43                                                          | 3372              |
|        |                                      |                                      | 18           | 2439                                                        | 52                                                          | 2561              |
|        |                                      |                                      | 19           | 1534                                                        | 12                                                          | 1611              |
|        |                                      |                                      | 20           | 2450                                                        | 0                                                           | 2573              |
|        |                                      |                                      | 21           | 2721                                                        | 0                                                           | 2857              |
|        |                                      |                                      | 22           | 1400                                                        | 7                                                           | 1470              |
|        |                                      |                                      | 23           | 1920                                                        | 95                                                          | 2016              |
|        |                                      |                                      | 24           | 1504                                                        | 43                                                          | 1579              |
|        |                                      |                                      | 25           | 6022                                                        | 0                                                           | 6323              |
|        |                                      |                                      | 26           | 1944                                                        | 0                                                           | 2041              |
|        |                                      |                                      | 27           | 1710                                                        | 25                                                          | 1796              |
|        |                                      |                                      | 28           | 1792                                                        | 810                                                         | 1882              |
|        |                                      |                                      | 29           | 3386                                                        | 61                                                          | 3555              |
|        |                                      |                                      | 30           | 1678                                                        | 108                                                         | 1762              |
| SG-14  | 40                                   | 182                                  | 1            | 2994                                                        | 82                                                          | 3144              |
|        |                                      |                                      | 2            | 2532                                                        | 0                                                           | 2659              |
|        |                                      |                                      | 3            | 1286                                                        | 428                                                         | 1350              |



**Supplemental Table S2 (cont). FTIR measurements of OH absorption bands of quartzites beneath the Moine thrust, Stack of Glencoul, NW Scotland**

| Sample | Structural Distance below Thrust (m) | OH Absorption Band Measurements      |              |                                                             |                                                             |                   |
|--------|--------------------------------------|--------------------------------------|--------------|-------------------------------------------------------------|-------------------------------------------------------------|-------------------|
|        |                                      | IR Plate thickness ( $\mu\text{m}$ ) | Quartz Grain | $\Delta$ of 3400 $\text{cm}^{-1}$ band ( $\text{cm}^{-2}$ ) | $\Delta$ of 3620 $\text{cm}^{-1}$ band ( $\text{cm}^{-2}$ ) | OH Content* (ppm) |
| SG-14  | 40                                   | 182                                  | 4            | 1450                                                        | 28                                                          | 1523              |
|        |                                      |                                      | 5            | 1557                                                        | 0                                                           | 1635              |
|        |                                      |                                      | 6            | 2429                                                        | 390                                                         | 2550              |
|        |                                      |                                      | 7            | 2146                                                        | 0                                                           | 2253              |
|        |                                      |                                      | 8            | 674                                                         | 0                                                           | 708               |
|        |                                      |                                      | 9            | 1462                                                        | 0                                                           | 1535              |
|        |                                      |                                      | 10           | 865                                                         | 0                                                           | 908               |
|        |                                      |                                      | 11           | 3172                                                        | 2173                                                        | 3331              |
|        |                                      |                                      | 12           | 1634                                                        | 1346                                                        | 1716              |
|        |                                      |                                      | 13           | 2022                                                        | 0                                                           | 2123              |
|        |                                      |                                      | 14           | 1571                                                        | 0                                                           | 1650              |
|        |                                      |                                      | 15           | 3502                                                        | 137                                                         | 3677              |
|        |                                      |                                      | 16           | 277                                                         | 0                                                           | 291               |
|        |                                      |                                      | 17           | 1601                                                        | 253                                                         | 1681              |
|        |                                      |                                      | 18           | 1000                                                        | 33                                                          | 1050              |
|        |                                      |                                      | 19           | 2187                                                        | 0                                                           | 2296              |
|        |                                      |                                      | 20           | 1269                                                        | 0                                                           | 1332              |
|        |                                      |                                      | 21           | 508                                                         | 0                                                           | 533               |
|        |                                      |                                      | 22           | 1776                                                        | 42                                                          | 1865              |
|        |                                      |                                      | 23           | 1665                                                        | 225                                                         | 1748              |
|        |                                      |                                      | 24           | 3071                                                        | 55                                                          | 3225              |
| SG-15  | 70                                   | 175                                  | 1            | 3566                                                        | 17                                                          | 3744              |
|        |                                      |                                      | 2            | 2997                                                        | 0                                                           | 3147              |
|        |                                      |                                      | 3            | 2435                                                        | 0                                                           | 2557              |
|        |                                      |                                      | 4            | 5337                                                        | 0                                                           | 5604              |
|        |                                      |                                      | 5            | 2875                                                        | 0                                                           | 3019              |
|        |                                      |                                      | 6            | 3993                                                        | 29                                                          | 4193              |
|        |                                      |                                      | 7            | 4029                                                        | 0                                                           | 4230              |
|        |                                      |                                      | 8            | 1619                                                        | 82                                                          | 1700              |
|        |                                      |                                      | 9            | 3001                                                        | 12                                                          | 3151              |
|        |                                      |                                      | 10           | 2772                                                        | 0                                                           | 2911              |
|        |                                      |                                      | 11           | 2067                                                        | 0                                                           | 2170              |
|        |                                      |                                      | 12           | 2165                                                        | 0                                                           | 2273              |

**Supplemental Table S2 (cont). FTIR measurements of OH absorption bands of quartzites beneath the Moine thrust, Stack of Glencoul, NW Scotland**

| Sample | Structural Distance below Thrust (m) | OH Absorption Band Measurements      |              |                                                             |                                                             |                   |
|--------|--------------------------------------|--------------------------------------|--------------|-------------------------------------------------------------|-------------------------------------------------------------|-------------------|
|        |                                      | IR Plate thickness ( $\mu\text{m}$ ) | Quartz Grain | $\Delta$ of 3400 $\text{cm}^{-1}$ band ( $\text{cm}^{-2}$ ) | $\Delta$ of 3620 $\text{cm}^{-1}$ band ( $\text{cm}^{-2}$ ) | OH Content* (ppm) |
| SG-15  | 70                                   | 175                                  | 13           | 2285                                                        | 0                                                           | 2399              |
|        |                                      |                                      | 14           | 3928                                                        | 0                                                           | 4124              |
|        |                                      |                                      | 15           | 5291                                                        | 0                                                           | 5556              |
|        |                                      |                                      | 16           | 4041                                                        | 0                                                           | 4243              |
|        |                                      |                                      | 17           | 6579                                                        | 0                                                           | 6908              |
|        |                                      |                                      | 18           | 6929                                                        | 0                                                           | 7275              |
|        |                                      |                                      | 19           | 5056                                                        | 0                                                           | 5309              |
|        |                                      |                                      | 20           | 5548                                                        | 0                                                           | 5825              |
|        |                                      |                                      | 21           | 4388                                                        | 0                                                           | 4607              |
|        |                                      |                                      | 22           | 3780                                                        | 18                                                          | 3969              |
|        |                                      |                                      | 23           | 2657                                                        | 14                                                          | 2790              |
|        |                                      |                                      | 24           | 2619                                                        | 9                                                           | 2750              |
|        |                                      |                                      | 25           | 3672                                                        | 0                                                           | 3856              |
|        |                                      |                                      | 26           | 4465                                                        | 20                                                          | 4688              |
|        |                                      |                                      | 27           | 6069                                                        | 16                                                          | 6372              |
|        |                                      |                                      | 28           | 4379                                                        | 38                                                          | 4598              |
|        |                                      |                                      | 29           | 3092                                                        | 0                                                           | 3247              |
|        |                                      |                                      | 30           | 3909                                                        | 0                                                           | 4104              |
|        |                                      |                                      | 31           | 4027                                                        | 23                                                          | 4228              |
|        |                                      |                                      | 32           | 4718                                                        | 23                                                          | 7954              |

\*Using calibration of Aines et al. (1984) for molecular water in quartz (ppm in molar OH/ $10^6\text{Si}$ )

**Supplemental Table S3. Mean OH contents of quartz grains in deformed quartzites beneath the Moine thrust, Stack of Glencoul, NW Scotland**

| Sample | Structural Distance below Thrust (m) | OH Contents              |                           |    |                               |
|--------|--------------------------------------|--------------------------|---------------------------|----|-------------------------------|
|        |                                      | Mean OH in Quartz* (ppm) | Standard Deviation* (ppm) | N  | Standard Error of Mean* (ppm) |
| SG-1   | 0.005                                | 1569                     | 1074                      | 22 | 229                           |
| SG-7   | 2.5                                  | 2263                     | 1550                      | 37 | 255                           |
| SG-8   | 2.9                                  | 1254                     | 713                       | 30 | 130                           |
| SG-10  | 4.6                                  | 2432                     | 707                       | 39 | 113                           |
| SG-13  | 8.5                                  | 2665                     | 1247                      | 30 | 228                           |
| SG-14  | 40                                   | 1866                     | 898                       | 24 | 183                           |
| SG-15  | 70                                   | 4078                     | 1397                      | 32 | 247                           |

\*Using calibration of Aines et al. (1984) for molecular water in quartz  
ppm in molar OH/10<sup>6</sup>Si

## DATA AVAILABILITY

Digital data files for IR absorbance spectra of Fig. 3, and the microstructural and IR absorption measurements of Supplemental Tables S1, S2, and S3 (some of which are displayed in Fig. 4) are available from the Texas Data Repository (<https://data.tdl.org/>). Data files (in csv format) and readme files (in txt format) can be downloaded either by entering “kronenberg” in the “Search” window of the Texas Data Repository page or visiting <https://dataverse.tdl.org/dataverse.xhtml?alias=root&q=kronenberg>.

## REFERENCES CITED

- Aines, R.D., Kirby, S.H., and Rossman, G.R., 1984, Hydrogen speciation in synthetic quartz: *Phys. Chem. Minerals*, v.11, p. 204-212, doi: 10.1007/BF00308135.
- Christie, J.M., 1963, The Moine thrust zone in the Assynt region, northwest Scotland: University of California Publication Geological Science, v. 40, p. 345-440.
- Francis, M.K., and Law, R.D., in preparation, Piezometry and strain rate estimates of the Moine thrust, Stack of Glencoul, NW Scotland: intended for publication in *J. Struct. Geol.*
- Holyoke, C. W., III and Kronenberg, A.K., 2010, Accurate differential stress measurement using the molten salt cell and solid salt assemblies in the Griggs rig with applications to strength, piezometers and rheology: *Tectonophysics*, v. 494, 17-31, doi:10.1016/j.tecto.2010.08.001.
- Kronenberg, A.K., Hasnan, H.F.B., Holyoke III, C.W., Law, R.D., Liu, Z., and Thomas, J.B., 2017, Synchrotron FTIR imaging of OH in quartz mylonites: *Solid Earth*, v. 8, p. 1025-1045, doi: 10.5194/se-8-1025-2017.
- Law, R.D., Casey, M., and Knipe, R.J., 1986, Kinematic and tectonic significance of microstructures and crystallographic fabrics within quartz mylonites from the Assynt and Eriboll regions of the Moine thrust zone, NW Scotland: *Trans. Roy. Soc. Edinburgh: Earth Sciences*, v. 77, p. 99-125.

- Law, R.D., Mainprice, D., Casey, M., Lloyd, G.E., Knipe, R.J., Cook, B., and Thigpen, J.R., 2010, Moine thrust zone mylonites at the Stack of Glencoul: 1 - microstructures, strain and influence of recrystallization on quartz crystal fabric development: Geological Society, London, Special Publications, v. 335, p. 543-577, doi: 10.1144/SP335.23.
- Roth, B.L., 2010, Flow Properties of Moine Thrust Zone Mylonites in Northern Assynt, NW Scotland: Masters Thesis, Virginia Tech, Blacksburg, VA, 111 p.
- Stipp, M., and Tullis, J., 2003, The recrystallized grain size piezometer for quartz: Geophys. Res. Lett, v. 30, p. 3-1-3-5, doi:10.1029/2003GL018444.
- Twiss, R.J., 1977, Theory and applicability of a recrystallized grain size paleopiezometer: Pure and Applied Geophysics, v. 115, p. 227-244, doi: 10.1007/BF01637105.
- Weathers, M.S., Bird, J.M., Cooper, R.F., and Kohlstedt, D.L., 1979, Differential stress determined from deformation-induced microstructures of the Moine thrust zone: J. Geophys. Res., v. 84, p. 7495-7509, doi: 10.1029/JB084iB13p07495.
